# Supplementary material for: Small-Molecules as Chemiluminescent Probes to Detect Lipase Activity
Source: MDPI journal article supplement (doi:10.3390/ijms23169039), 2022-08-12
Supplement: s1 [file s1]

## Supplementary Materials

# Small-Molecules as Chemiluminescent Probes to Detect the Lipase Activity

Paolo La Rocca<sup>1</sup>, Alessandra Mingione<sup>2</sup>, Silvana Casati<sup>2</sup>, Roberta Ottria<sup>2</sup>, Pietro Allevi<sup>3</sup>, Pierangela Ciuffreda<sup>2</sup> and Paola Rota<sup>3,\*</sup>

<sup>1</sup> Dipartimento di Scienze Biomediche per la Salute, Università degli Studi di Milano, 20133 Milano, Italy

<sup>2</sup> Dipartimento di Scienze Biomediche e Cliniche, Università di Milano, 20157 Milano, Italy

<sup>3</sup> Dipartimento di Scienze Biomediche, Chirurgiche ed Odontoiatriche, Università degli Studi di Milano, 20133 Milano, Italy; paola.rota@unimi.it (P.R.)

| Table of contents                                                                 | Pag. |
|-----------------------------------------------------------------------------------|------|
| ▪ Chemiluminescence kinetic profile of compounds <b>2</b> , <b>3</b> and <b>4</b> | S1   |
| ▪ Figure S2. <sup>1</sup> H and <sup>13</sup> C NMR of compound <b>5</b>          | S2   |
| ▪ Figure S3. <sup>1</sup> H NMR of compound <b>9</b>                              | S3   |
| ▪ Figure S4. <sup>1</sup> H and <sup>13</sup> C NMR of compound <b>10</b>         | S4   |
| ▪ Figure S5. <sup>1</sup> H NMR of compound <b>11</b>                             | S5   |
| ▪ Figure S6. <sup>1</sup> H and <sup>13</sup> C NMR of compound <b>2</b>          | S6   |
| ▪ Figure S7. <sup>1</sup> H and <sup>13</sup> C NMR of compound <b>3</b>          | S7   |
| ▪ Figure S8. <sup>1</sup> H and <sup>13</sup> C NMR of compound <b>4</b>          | S8   |

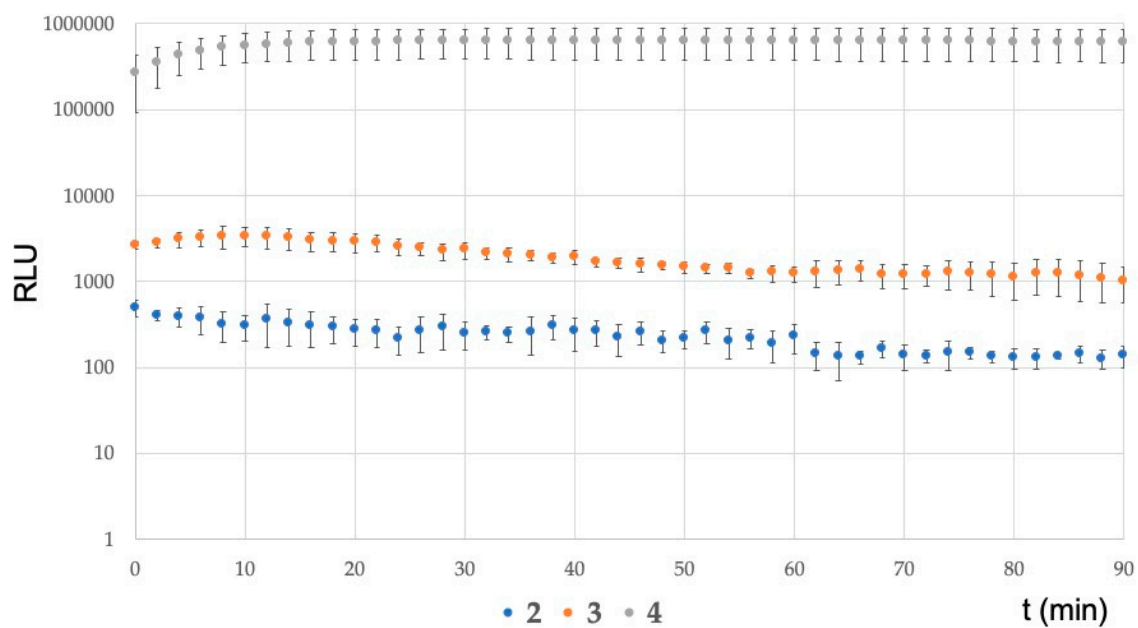

Figure S1. Chemiluminescence kinetic profile of compounds **2**, **3** and **4** in Tris-HCl buffer (pH 7.4, 1mM EDTA, 10% DMSO) in the absence of the enzymes. The compound **4** exhibited a much higher luminescence signal than compounds **2** and **3** in the reaction buffer. The graph shows the mean +/- SD.

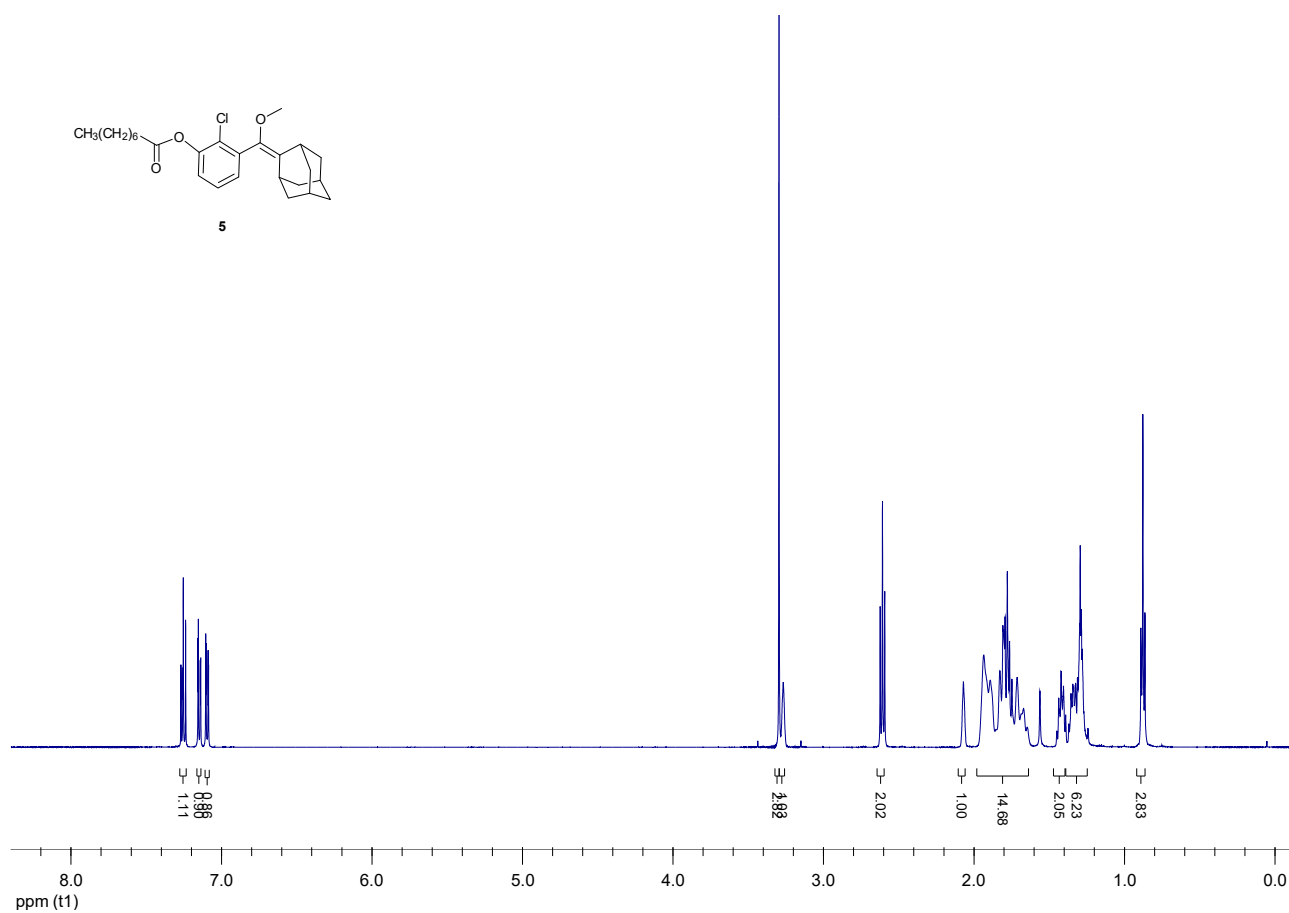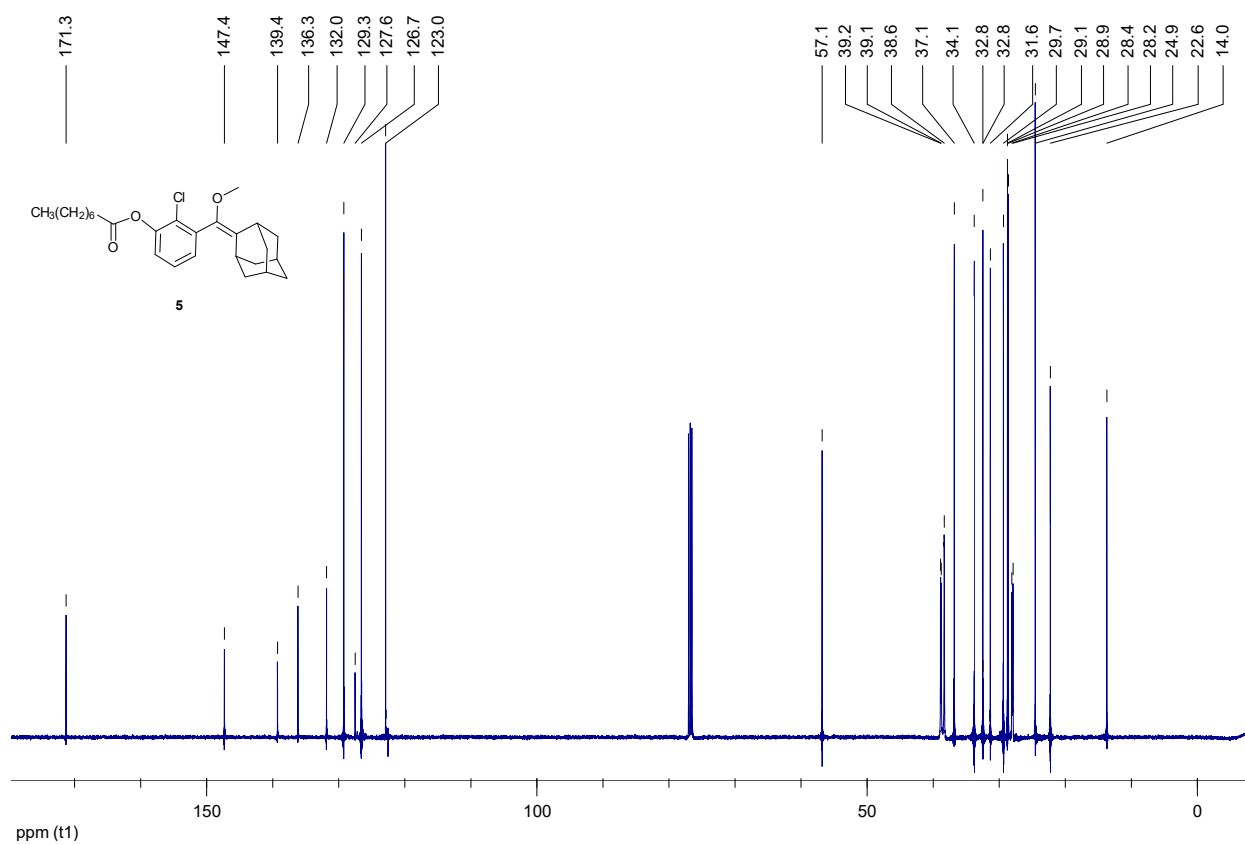

Figure S2.  $^1\text{H}$  and  $^{13}\text{C}$  NMR of compound **5**

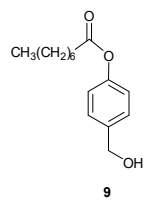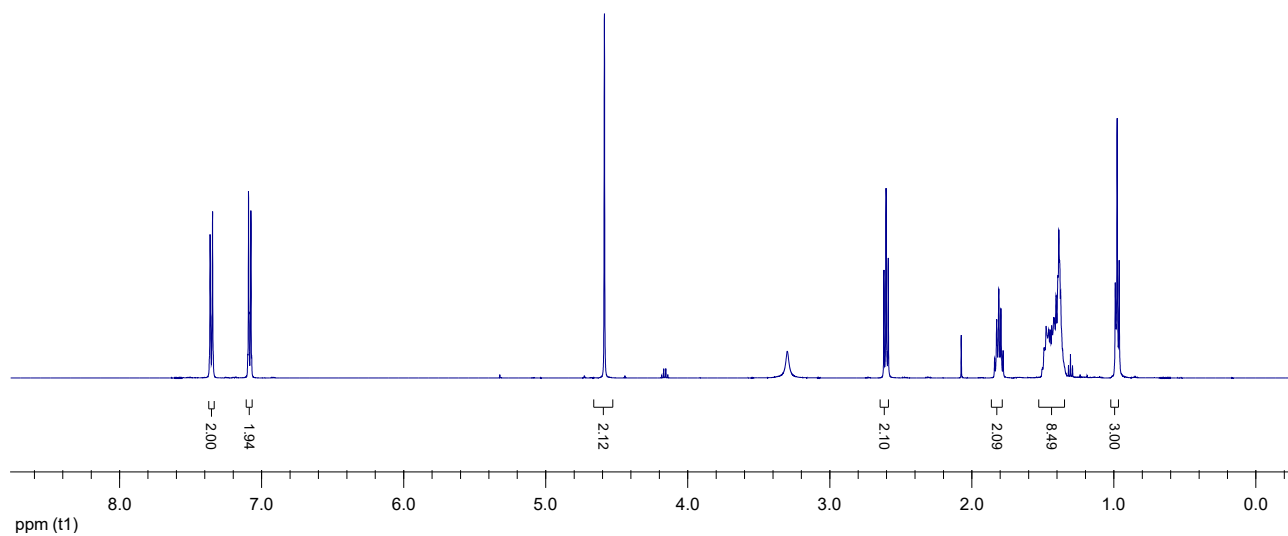

Figure S3.  $^1\text{H}$  NMR of compound **9**

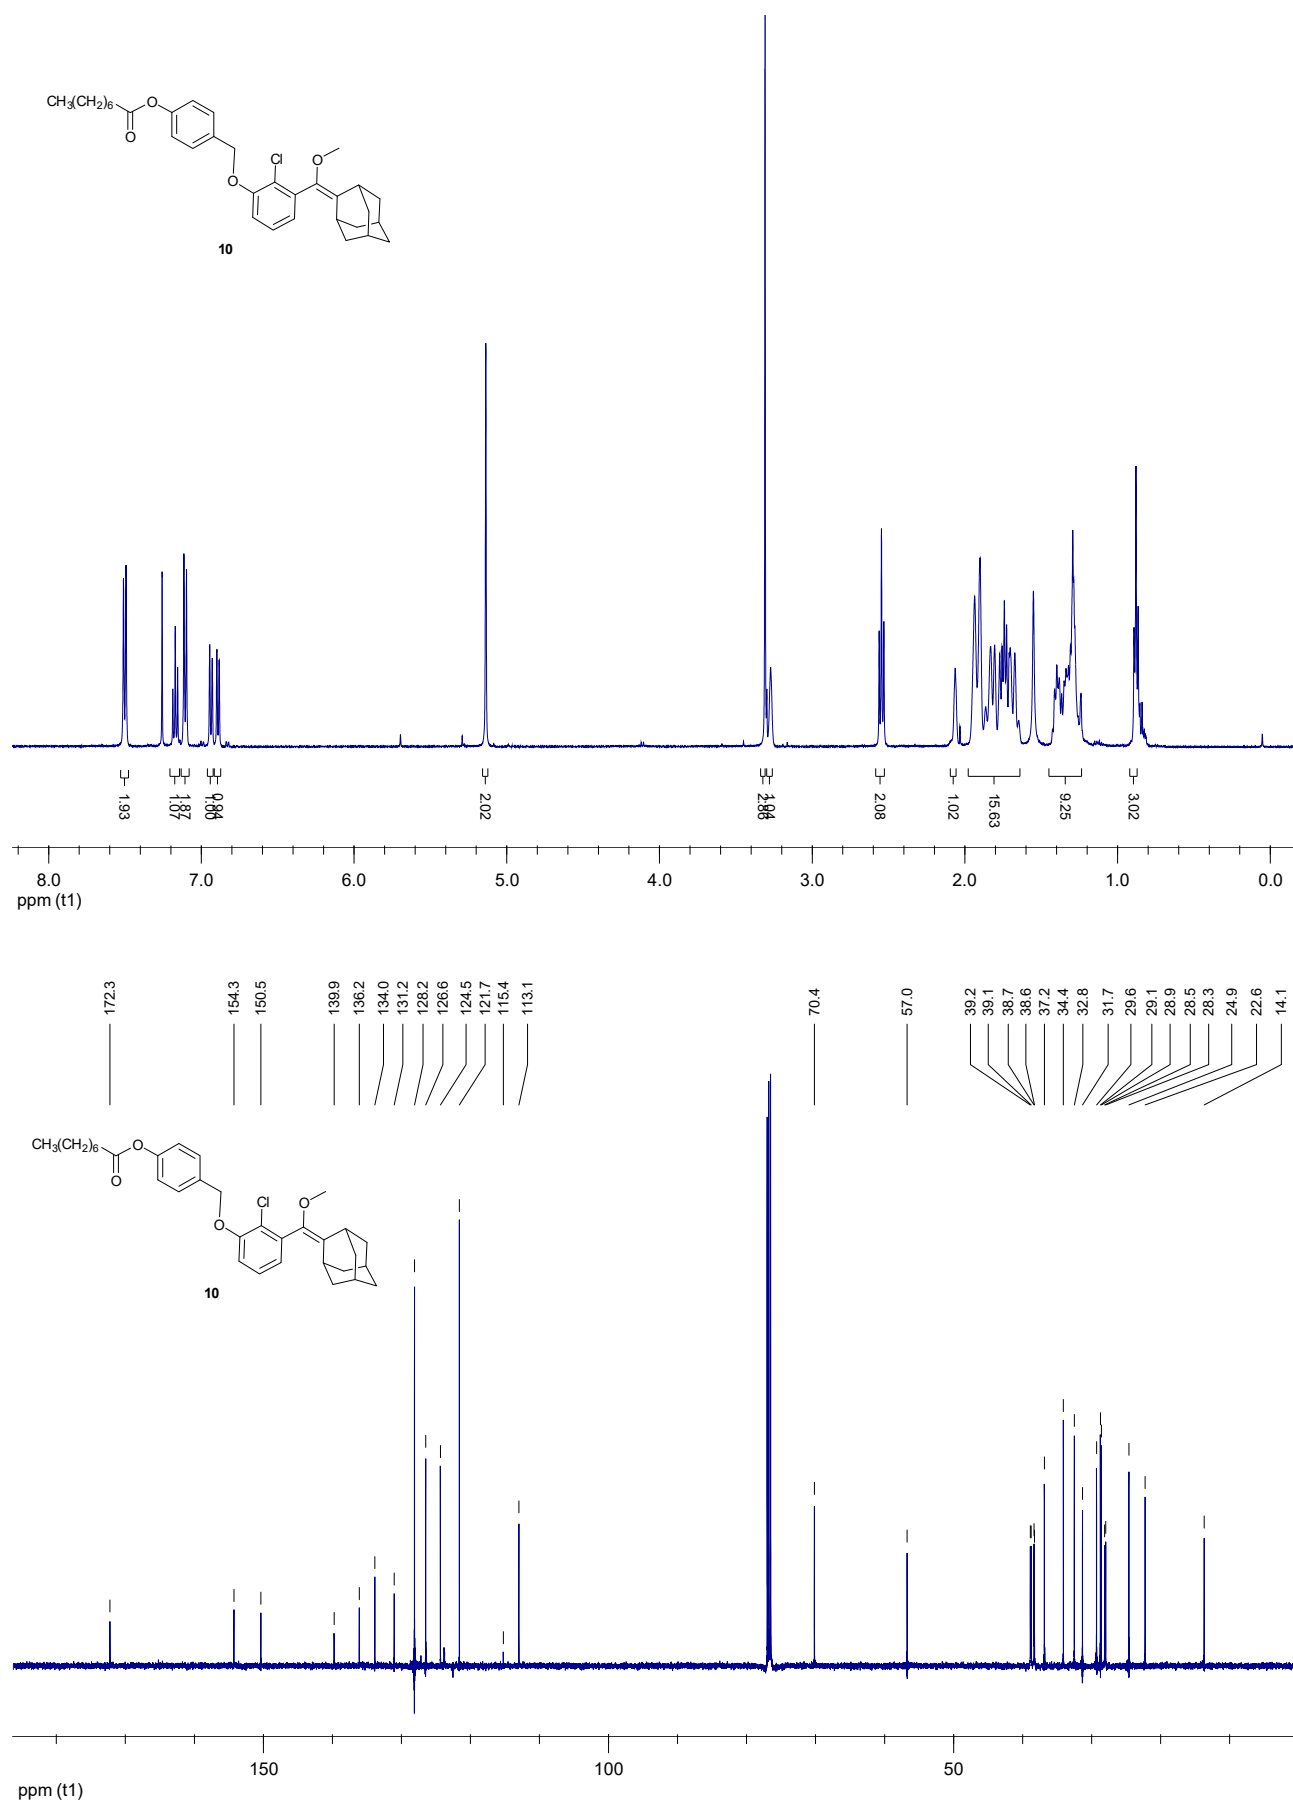

Figure S4.  $^1\text{H}$  and  $^{13}\text{C}$  NMR of compound **10**

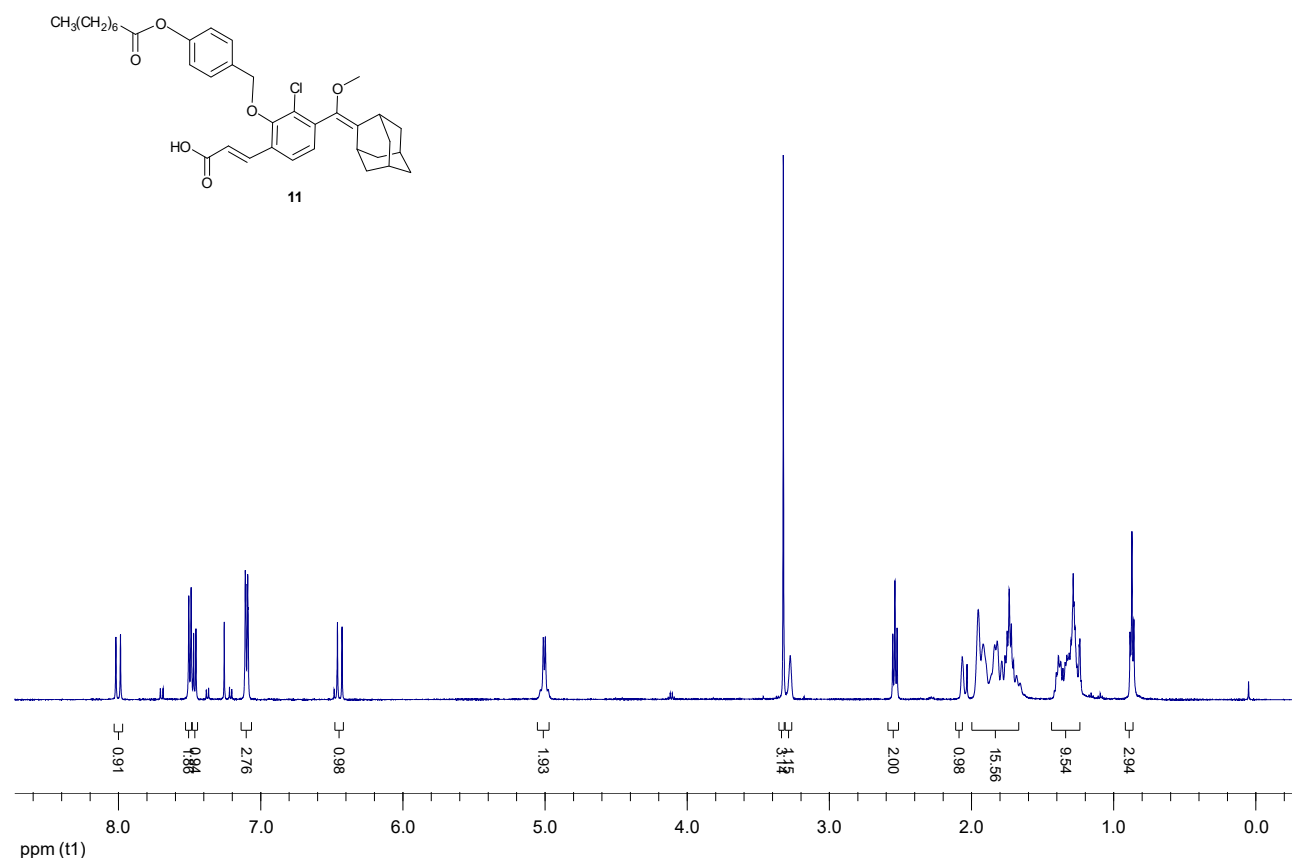

Figure S5.  $^1\text{H}$  NMR of compound **11**

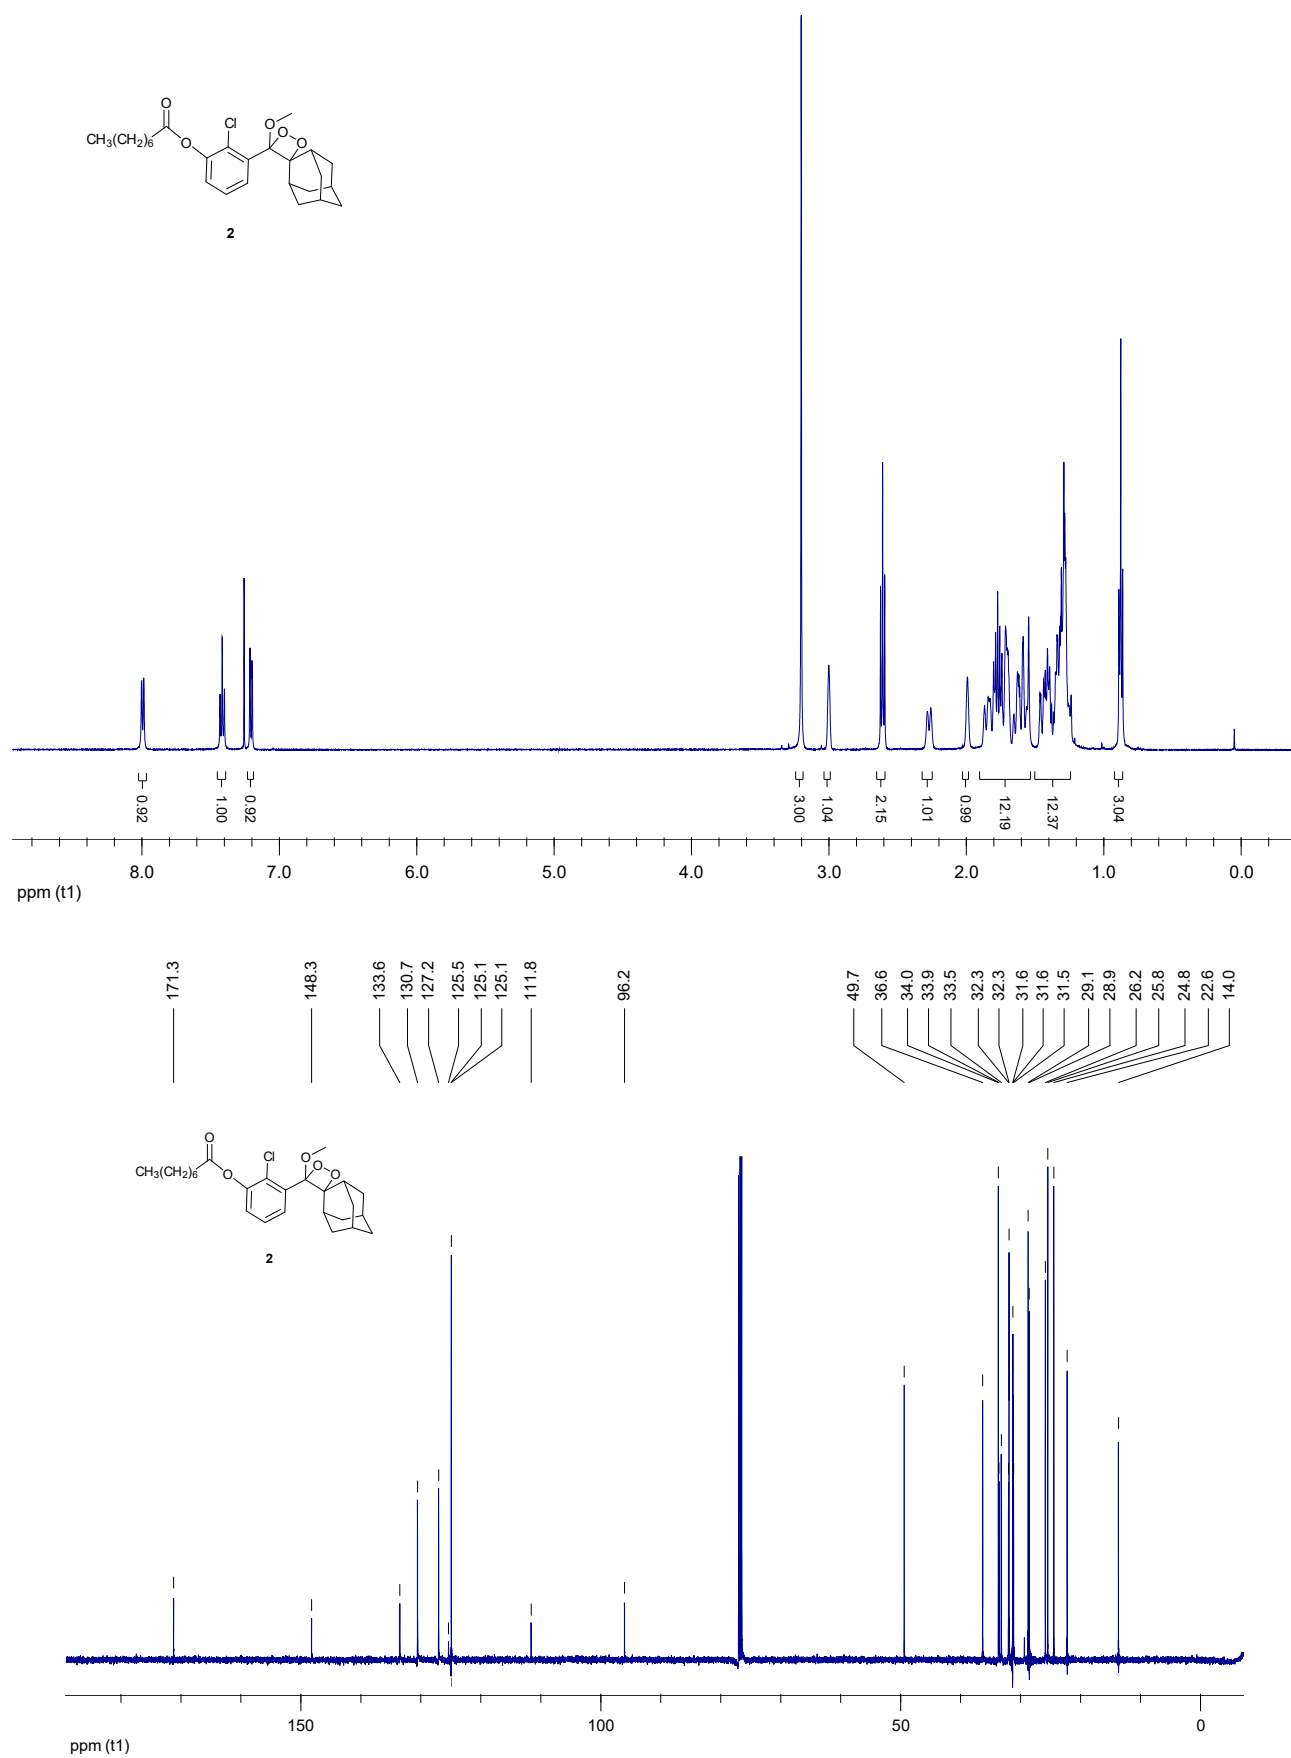

Figure S6. <sup>1</sup>H and <sup>13</sup>C NMR of compound **2**

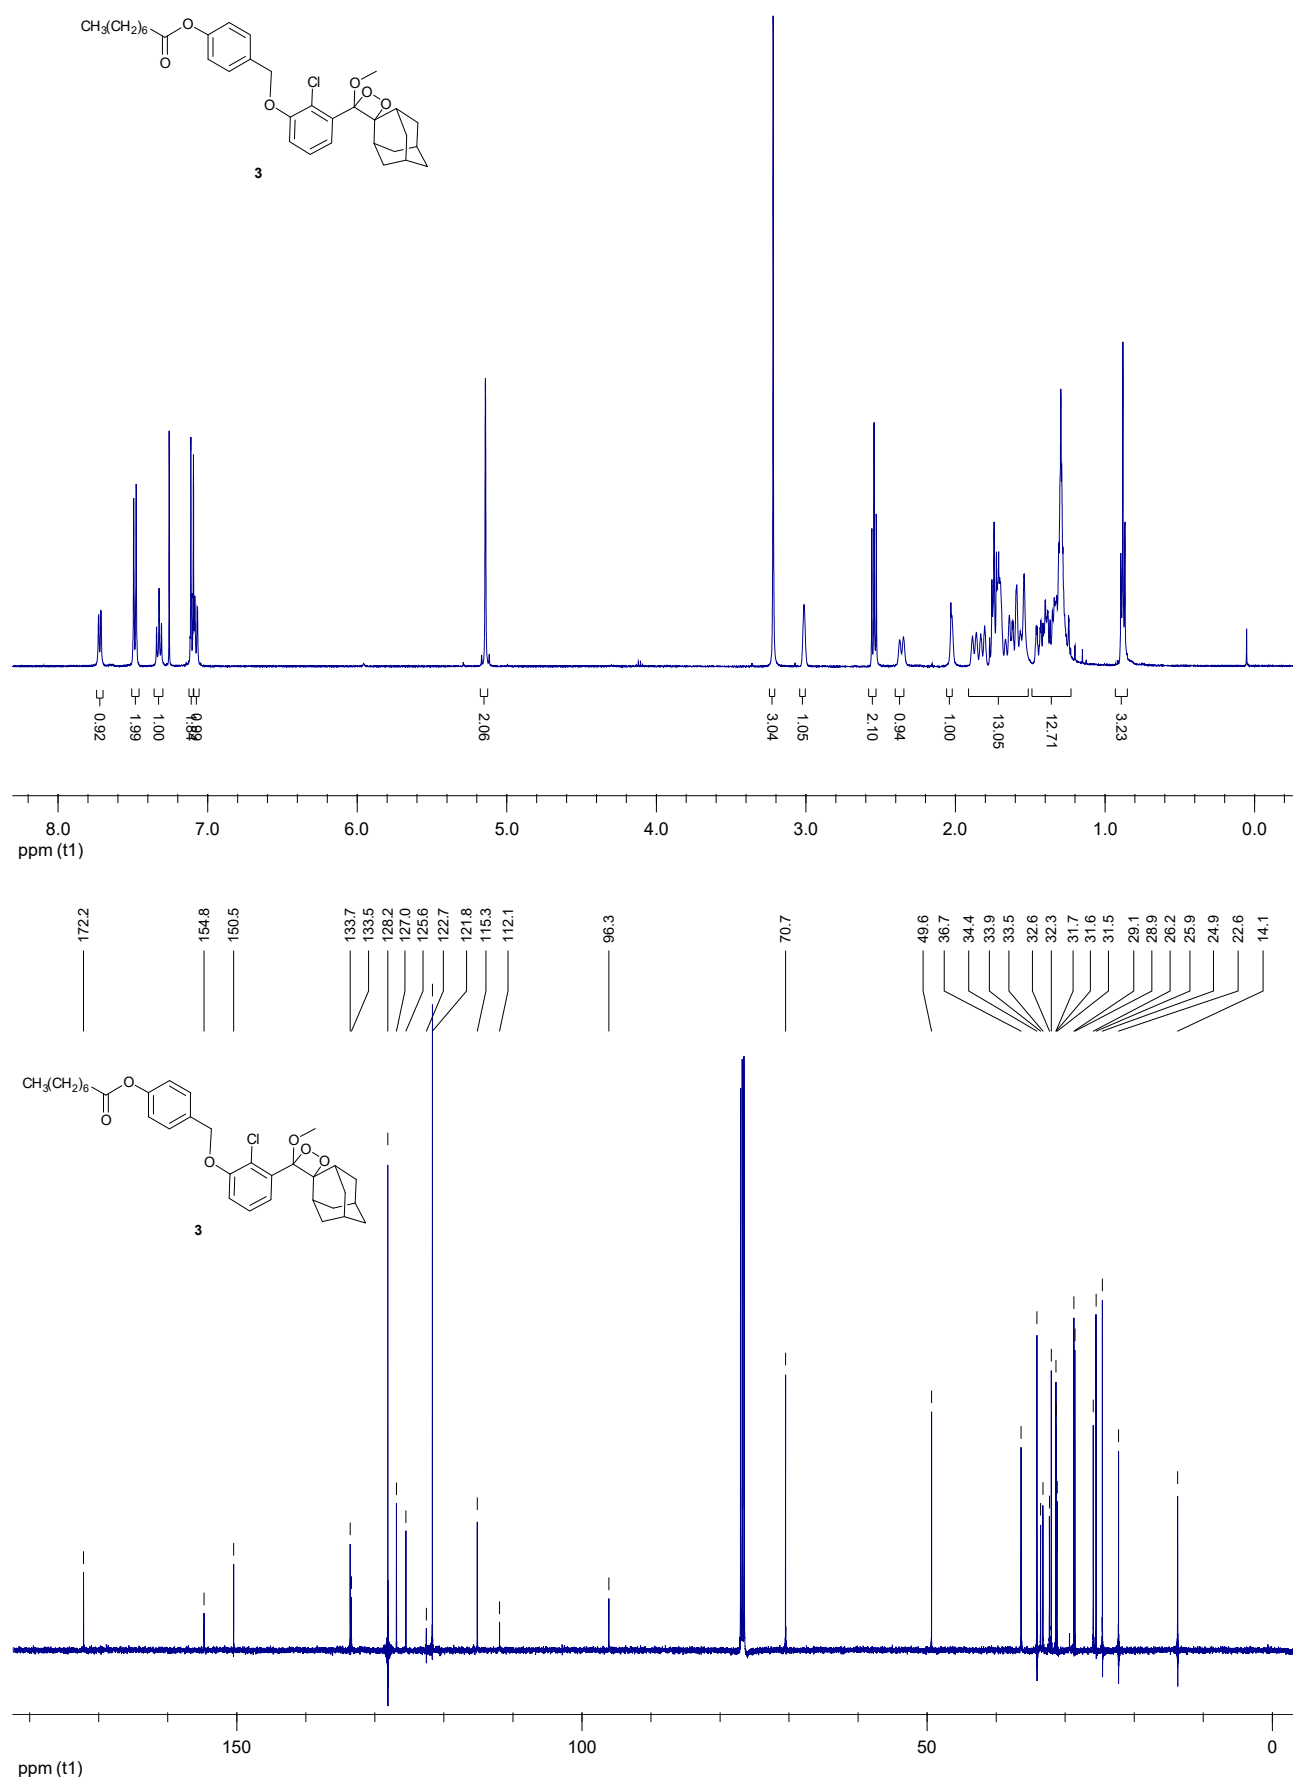

Figure S7.  $^1\text{H}$  and  $^{13}\text{C}$  NMR of compound **3**



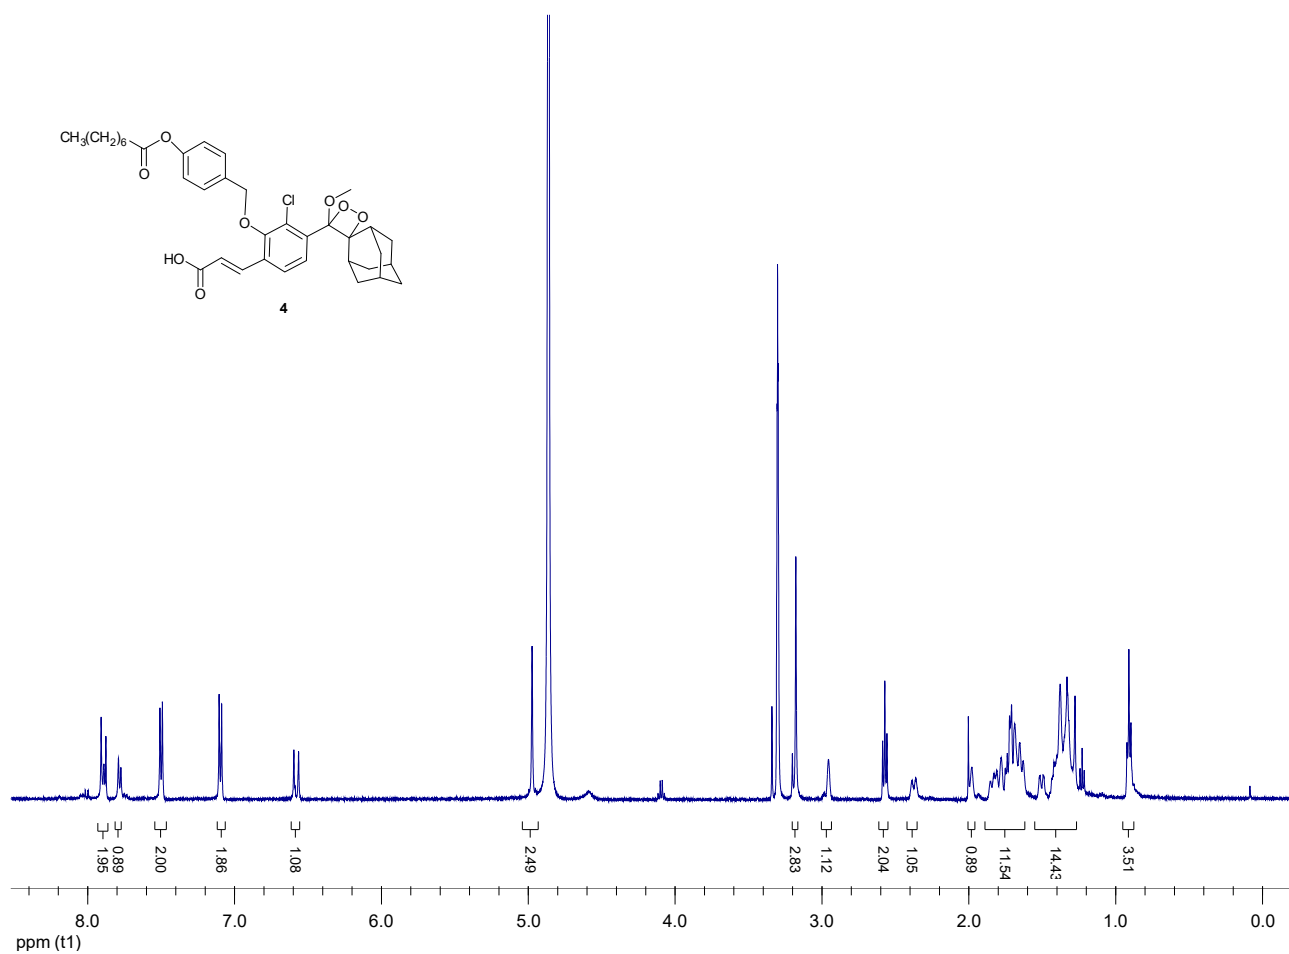

Figure S8.  $^1\text{H}$  and  $^{13}\text{C}$  NMR of compound **4**
